# Supplementary material for: Quantitative assessment of device–clot interaction for stent retriever thrombectomy
Source: PubMed Central journal article supplement — J Neurointerv Surg. 2016 Feb 1;8(12):1278–82. doi: 10.1136/neurintsurg-2015-012209 (PMC5136713; doi:10.1136/neurintsurg-2015-012209), 2016-02-01
Supplement: neurintsurg-2015-012209-s1.pdf [file neurintsurg-2015-012209-s1.pdf]

## **Supplemental Results**

Video 1: Straight unsheathing of the Trevo in the hard clot model

Colormap showing the distance (mm) from the clot to the closest segmented marker wire of the device. Cooler colors indicate close proximity to the device.

Video 2: Initial unsheathing followed by forward advancement of the Trevo in the hard clot model

Again, colormap indicates the distance (mm) of the clot from the stent marker wires. Notably uniform penetration of the device into the clot.
